# Supplementary material for: SABRE Hyperpolarization with up to 200 bar Parahydrogen in Standard and Quickly Removable Solvents
Source: MDPI journal article supplement (doi:10.3390/ijms24032465), 2023-01-27
Supplement: s1 [file s1]

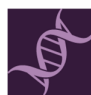

Communication

# Supplementary Information for

## SABRE hyperpolarization with up to 200 bar parahydrogen in standard and quickly removable solvents

Anton Duchowny<sup>1</sup>, Johannes Denninger<sup>1</sup>, Lars Lohmann<sup>1</sup>, Thomas Theis<sup>2</sup>, Sören Lehmkuhl<sup>3</sup>, and Alina Adams<sup>1\*</sup>

<sup>1</sup> Institut für Technische und Makromolekulare Chemie, RWTH Aachen University, 52074 Aachen, Germany

<sup>2</sup> Department of Chemistry, North Carolina State University, Raleigh, North Carolina 27695, USA

<sup>3</sup> Institute of Microstructure Technology, Karlsruhe Institute of Technology, 76344 Eggenstein-Leopoldshafen, Germany

\* Correspondence: Alina.Adams@itmc.rwth-aachen.de

### Table of contents

Figure S1: Hydride signals of hyperpolarized solutions with 17.5 mmol L<sup>-1</sup> pyrazine at different pressures.

Figure S2: Integrals of hydride signals with increasing pressure. The dotted lines serve as a visual guide.

Figure S3: Photo-collage showing the solid catalyst-pyrazine sample before applying *p*-H<sub>2</sub>/CO<sub>2</sub> (left and middle) and the recrystallized sample after removing the gas (right).

Figure S4: Photo-collage showing the liquefied catalyst-pyrazine sample after applying gas pressure. The top left and bottom photos show the sample pressurized at 200 bar with only CO<sub>2</sub> to acquire the spectrum at thermal polarization. The upper right photo shows the activated catalyst under *p*-H<sub>2</sub>/CO<sub>2</sub>.

Figure S5: Hydride signals of hyperpolarized pyrazine solutions with two solvents: *d*-methanol (green) and in liquefied CO<sub>2</sub> (blue).

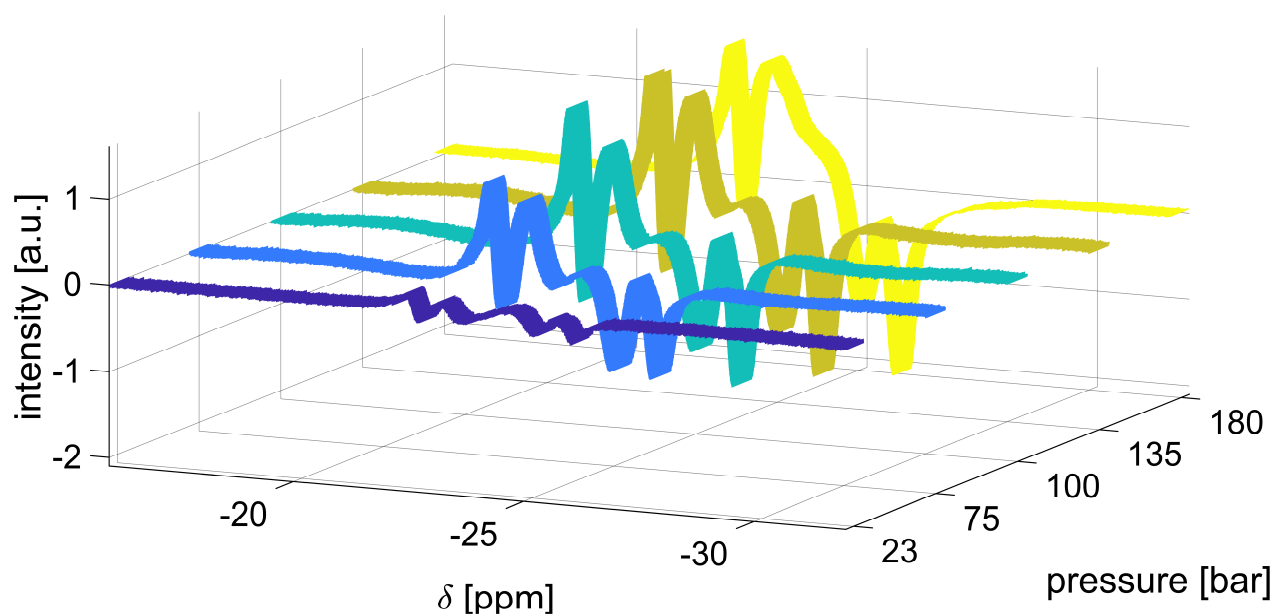

**Figure S1:** Hydride signals of hyperpolarized solutions with 17.5 mmol L<sup>-1</sup> pyrazine at different pressures.

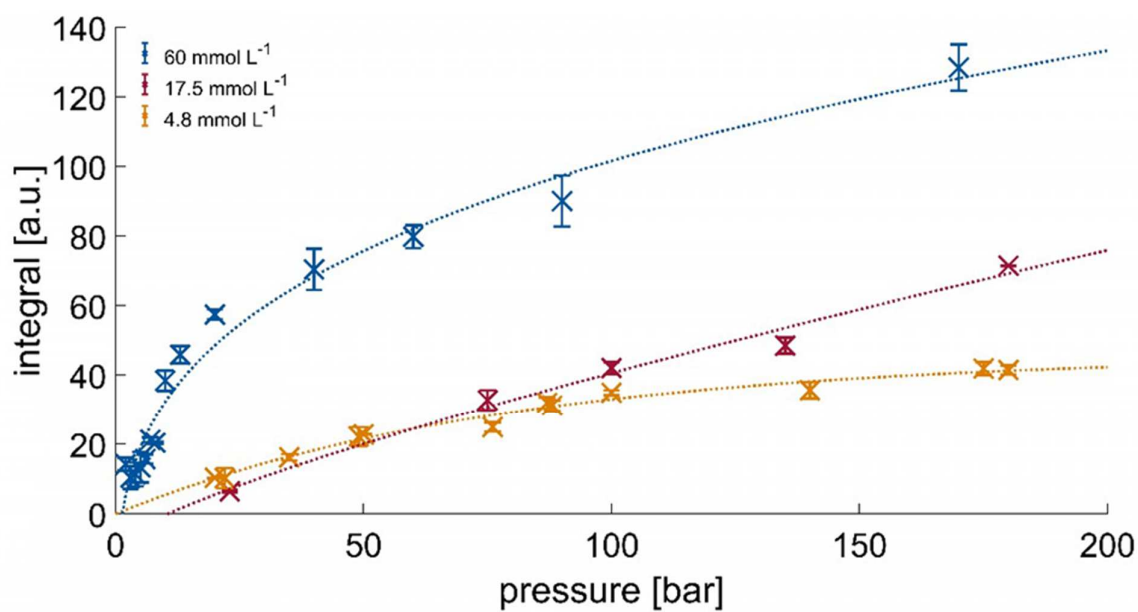

**Figure S2:** Integrals of hydride signals with increasing the pressure. The dotted lines serve as a visual guide.

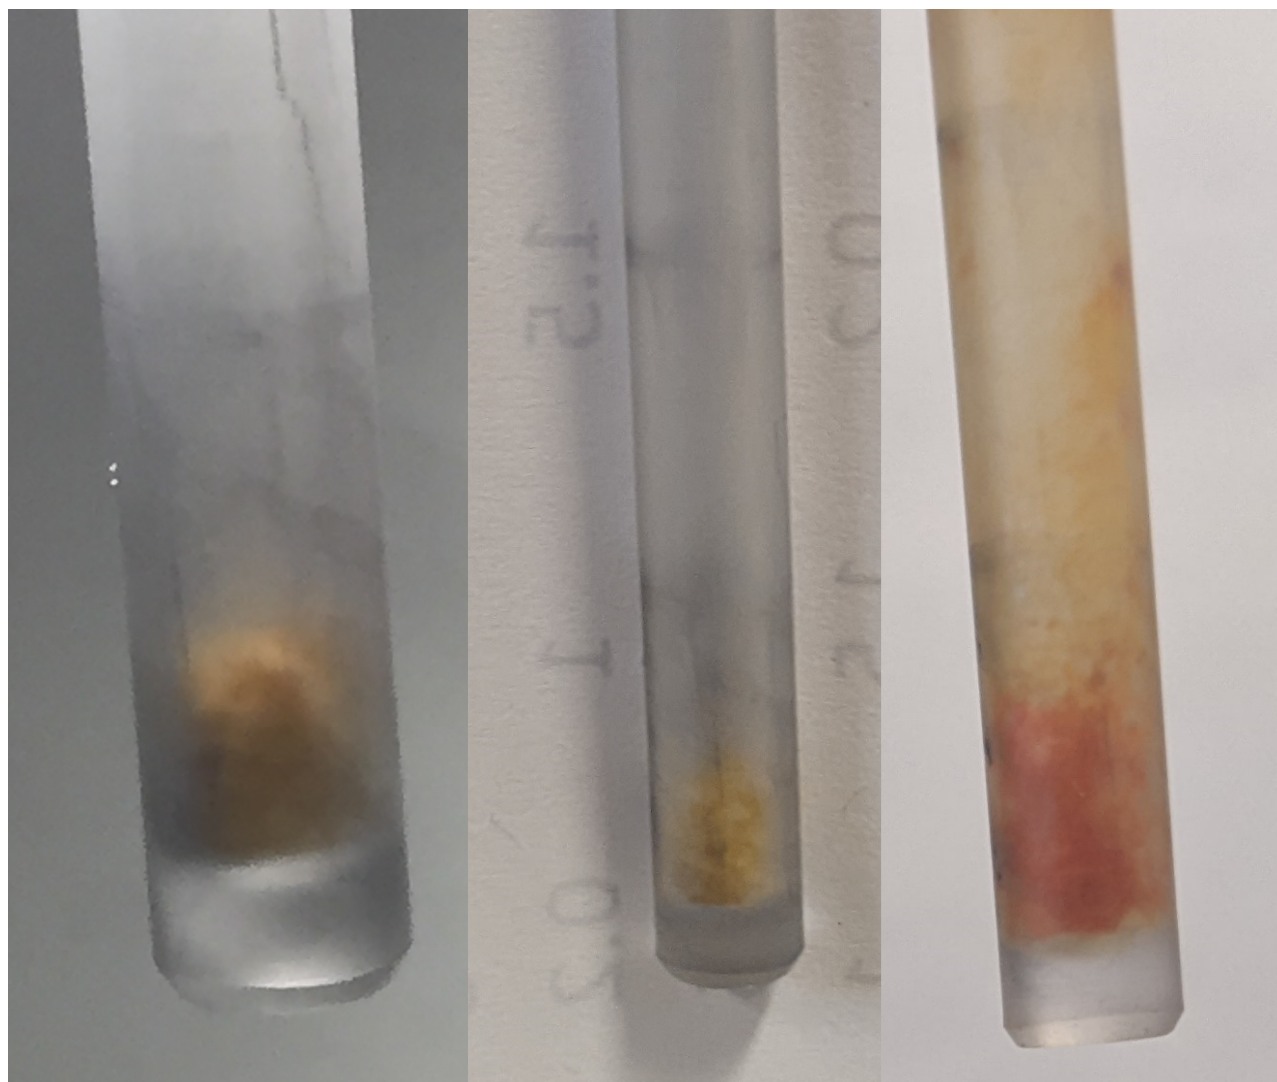

**Figure S3:** Photo-collage showing the solid catalyst-pyrazine sample before applying  $p\text{-H}_2/\text{CO}_2$  (left and middle) and the recrystallized sample after removing the gas (right).

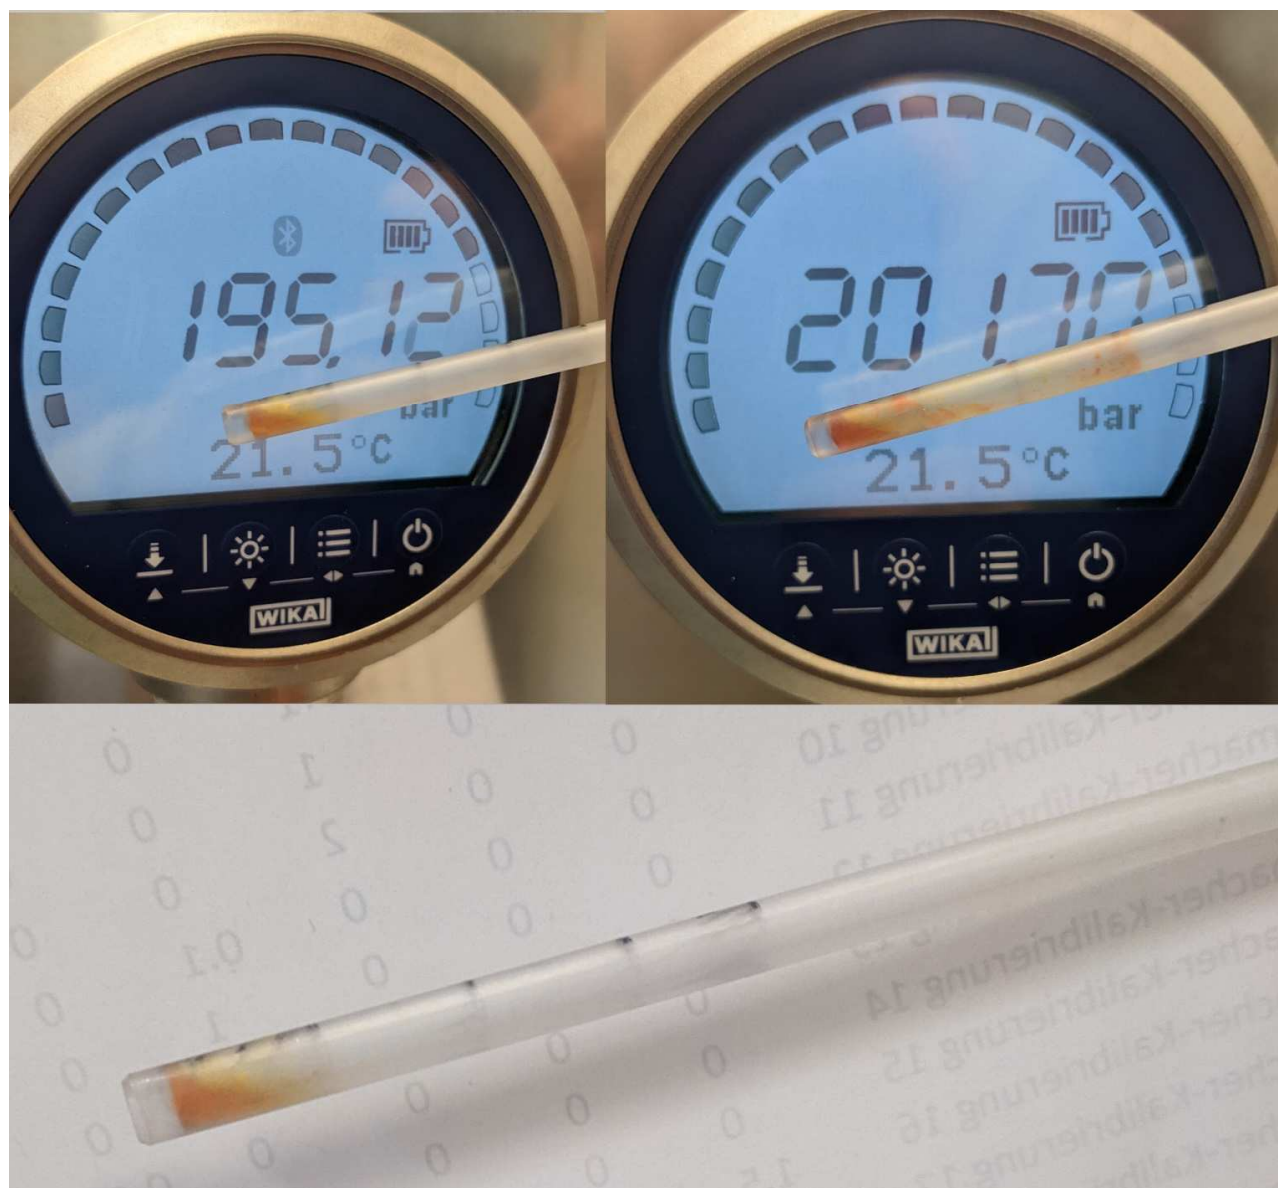

**Figure S4:** Photo-collage showing the liquefied catalyst-pyrazine sample after applying gas pressure. The top left and bottom photos show the sample pressurized at 200 bar with only CO<sub>2</sub> to acquire the spectrum at thermal polarization. The upper right photo shows the activated catalyst under *p*-H<sub>2</sub>/CO<sub>2</sub>.

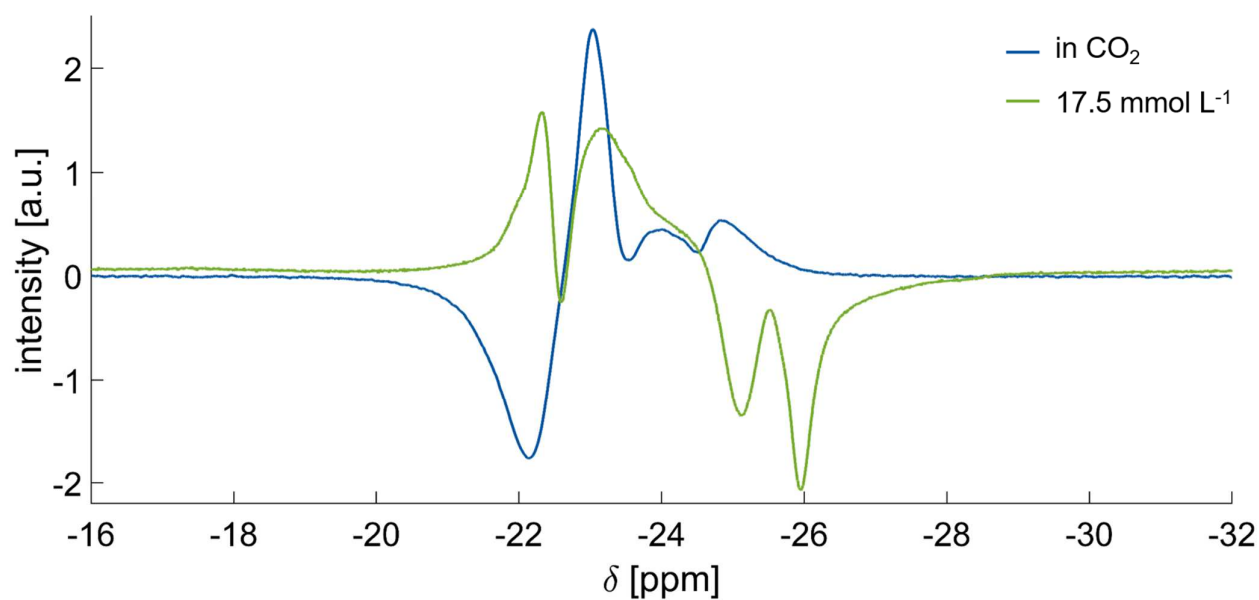

**Figure S5:** Hydride signals of hyperpolarized pyrazine solutions with two solvents: *d*-methanol (green) and in liquefied CO<sub>2</sub> (blue).
